# Supplementary material for: Theoretical prediction and design for chalcogenide-quantum-dot/TiO2 heterojunctions for solar cell applications
Source: Royal Society of Chemistry journal article supplement (doi:10.1039/d2ra05116h), 2022-01-01
Supplement: d2ra05116h1.pdf [file d2ra05116h1.pdf]

## Supporting Information

### **Theoretical prediction and design for chalcogenide-quantum-dot/TiO<sub>2</sub> heterojunctions for solar cell applications**

Kangqi Shen<sup>b</sup>, Govindarajan Saranya<sup>b</sup> and Mingyang Chen<sup>a,b,\*</sup>

<sup>a</sup> Beijing Computational Science Research Center, Beijing 100193, China

<sup>b</sup> Center for Green Innovation, School of Materials Science and Engineering, University of Science and Technology Beijing, Beijing 100083, China.

*\*Corresponding author e-mail: shenkangqi@csrc.ac.cn*

*mychen@ustb.edu.cn*

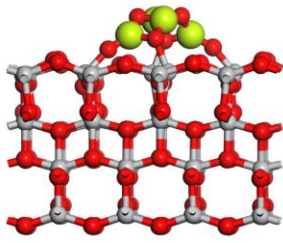

**Be4O4/TiO<sub>2</sub>(001)**

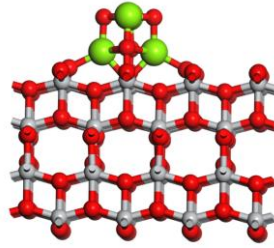

**Mg4O4/TiO<sub>2</sub>(001)**

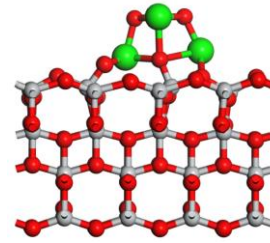

**Sr4O4/TiO<sub>2</sub>(001)**

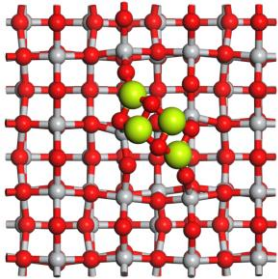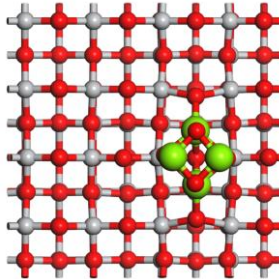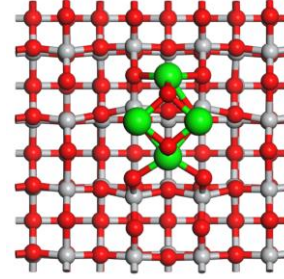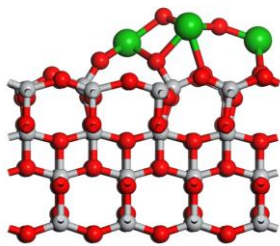

**Ba4O4/TiO<sub>2</sub>(001)**

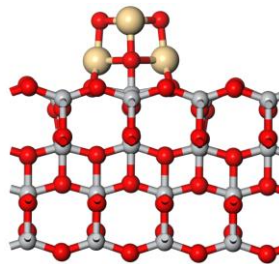

**Cd4O4/TiO<sub>2</sub>(001)**

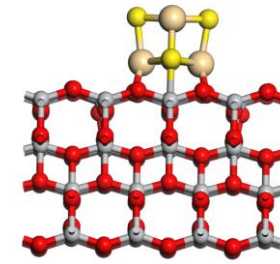

**Cd4S4/TiO<sub>2</sub>(001)**

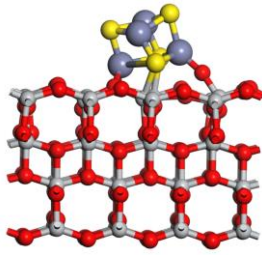

**Zn<sub>4</sub>S<sub>4</sub>/TiO<sub>2</sub>(001)**

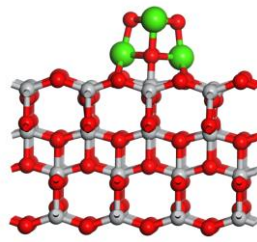

**Ca<sub>4</sub>O<sub>4</sub>/TiO<sub>2</sub>(001)**

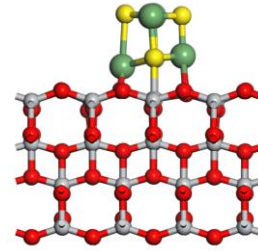

**Ge<sub>4</sub>S<sub>4</sub>/TiO<sub>2</sub>(001)**

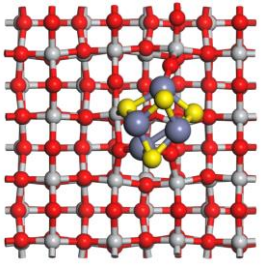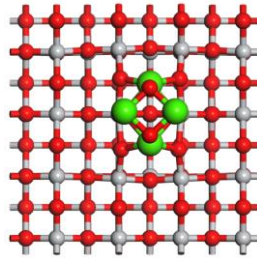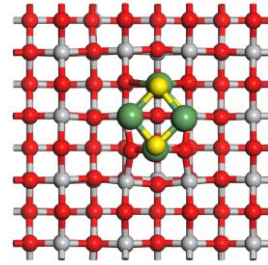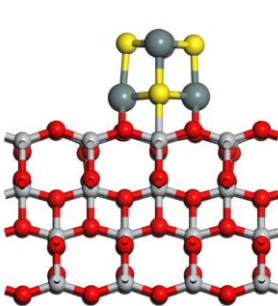

**Sn<sub>4</sub>S<sub>4</sub>/TiO<sub>2</sub>(001)**

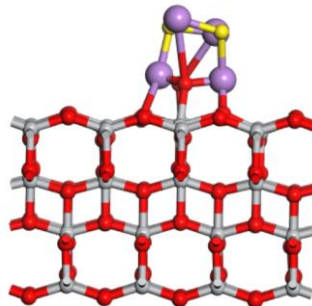

**As<sub>4</sub>S<sub>2</sub>O<sub>2</sub>/TiO<sub>2</sub>(001)**

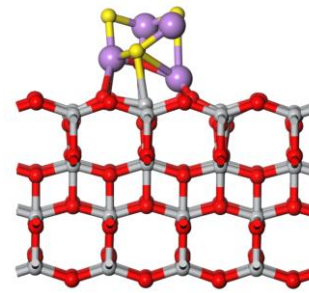

**As<sub>4</sub>S<sub>3</sub>O/TiO<sub>2</sub>(001)**

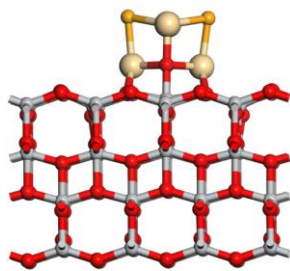

**Cd<sub>4</sub>Se<sub>2</sub>O<sub>2</sub>/TiO<sub>2</sub>(001)**

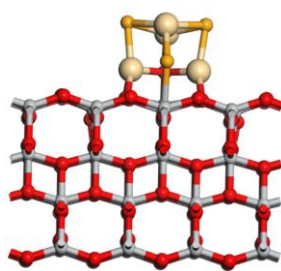

**Cd<sub>4</sub>Se<sub>3</sub>O/TiO<sub>2</sub>(001)**

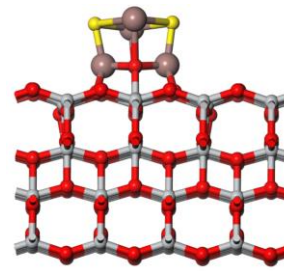

**In<sub>4</sub>S<sub>2</sub>O<sub>2</sub>/TiO<sub>2</sub>(001)**

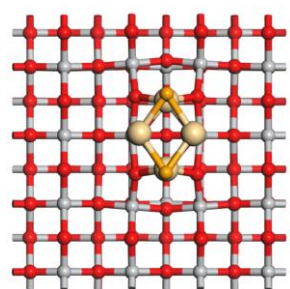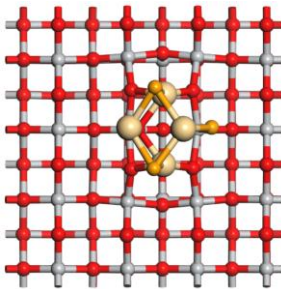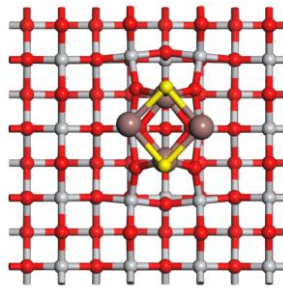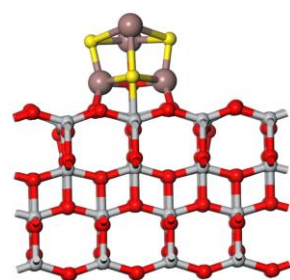

**In<sub>4</sub>S<sub>3</sub>O/TiO<sub>2</sub>(001)**

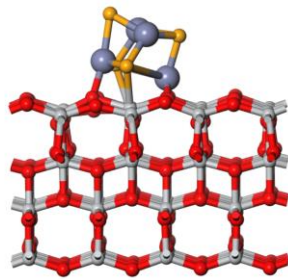

**Zn<sub>4</sub>Se<sub>4</sub>/TiO<sub>2</sub>(001)**

**Fig.S1 QD/TiO<sub>2</sub>(001) Optimized structure**

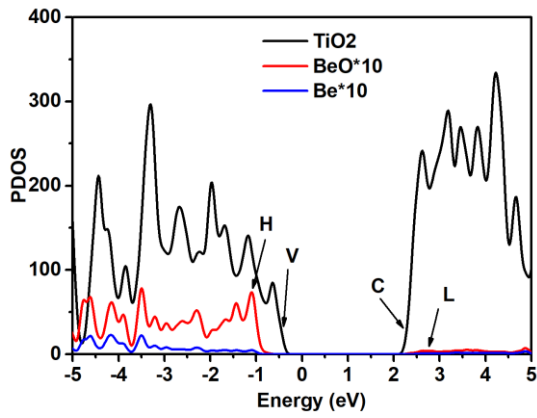

PDOS of Be<sub>4</sub>O<sub>4</sub>/TiO<sub>2</sub>(001)

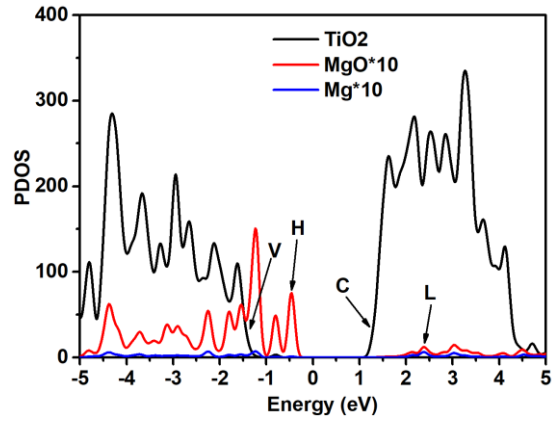

PDOS of Mg<sub>4</sub>O<sub>4</sub>/TiO<sub>2</sub>(001)

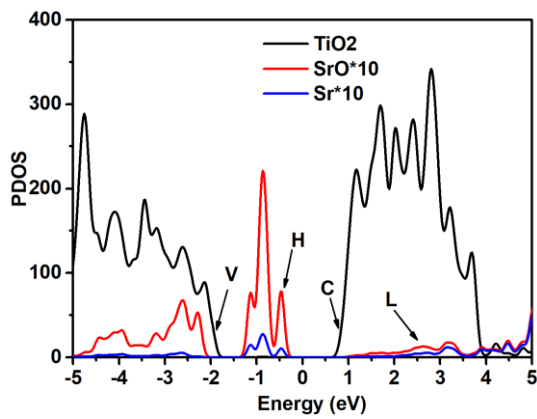

PDOS of Sr<sub>4</sub>O<sub>4</sub>/TiO<sub>2</sub>(001)

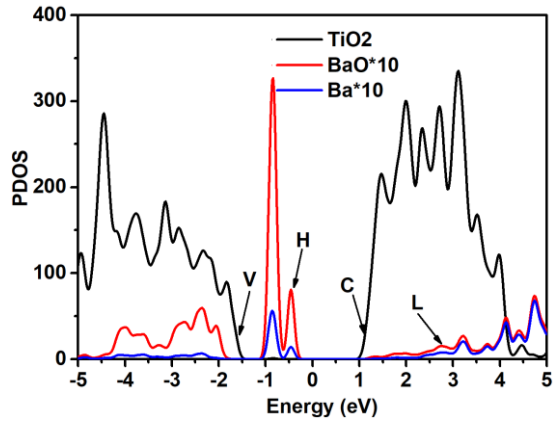

PDOS of Ba<sub>4</sub>O<sub>4</sub>/TiO<sub>2</sub>(001)

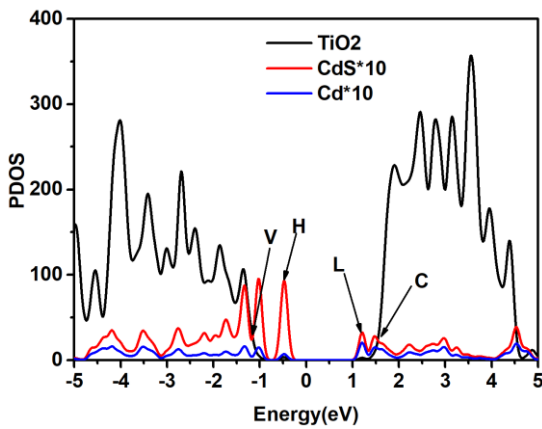

PDOS of Cd<sub>4</sub>S<sub>4</sub>/TiO<sub>2</sub>(001)

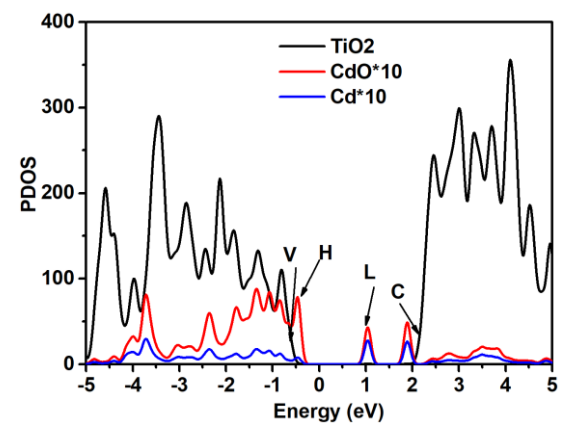

PDOS of Cd<sub>4</sub>O<sub>4</sub>/TiO<sub>2</sub>(001)

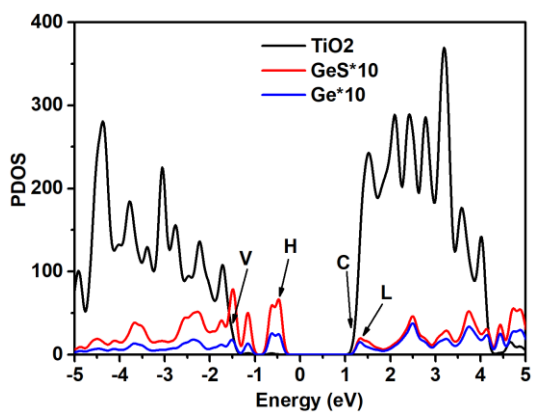

**PDOS of Ge<sub>4</sub>S<sub>4</sub>/TiO<sub>2</sub>(001)**

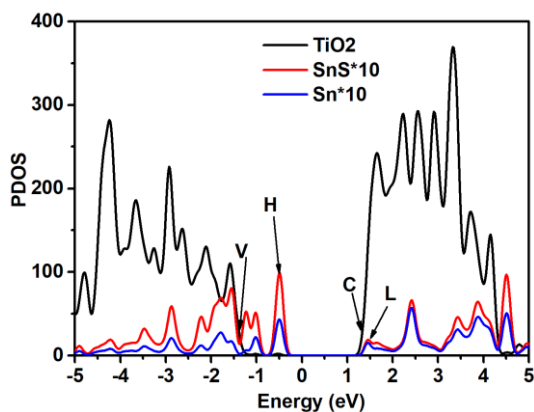

**PDOS of Sn<sub>4</sub>S<sub>4</sub>/TiO<sub>2</sub>(001)**

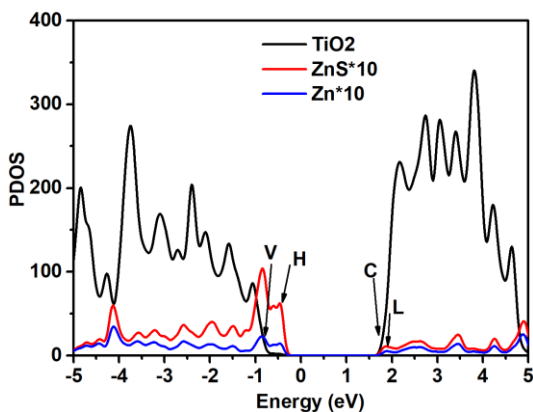

**PDOS of Zn<sub>4</sub>S<sub>4</sub>/TiO<sub>2</sub>(001)**

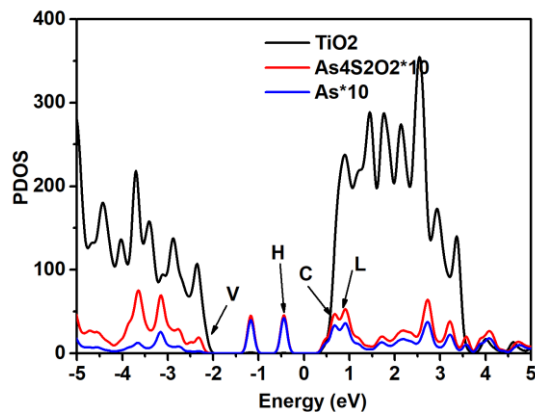

**PDOS of As<sub>4</sub>S<sub>2</sub>O<sub>2</sub>/TiO<sub>2</sub>(001)**

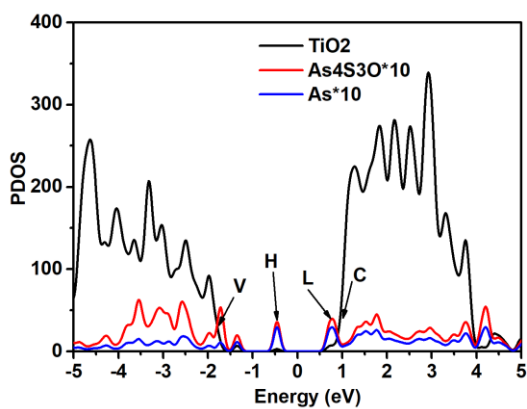

**PDOS of As<sub>4</sub>S<sub>3</sub>O/TiO<sub>2</sub>(001)**

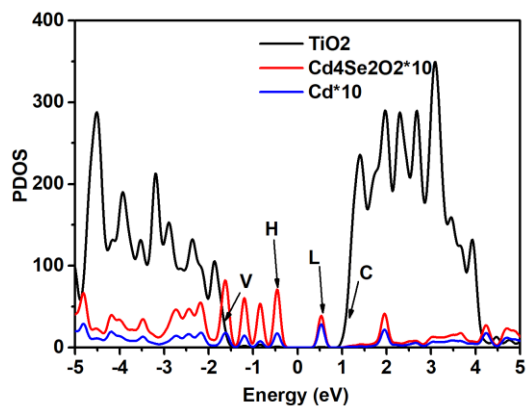

**PDOS of Cd<sub>4</sub>Se<sub>2</sub>O<sub>2</sub>/TiO<sub>2</sub>(001)**

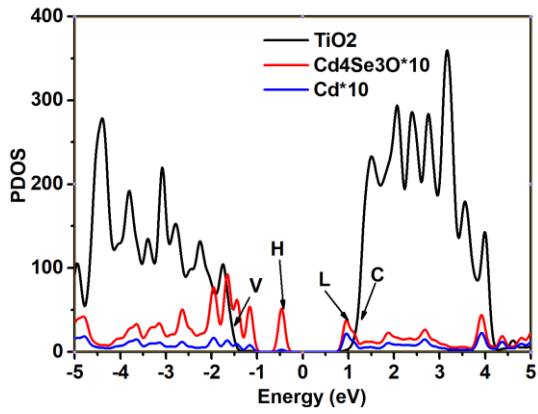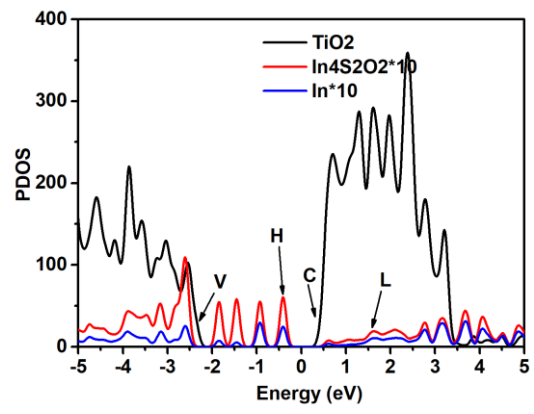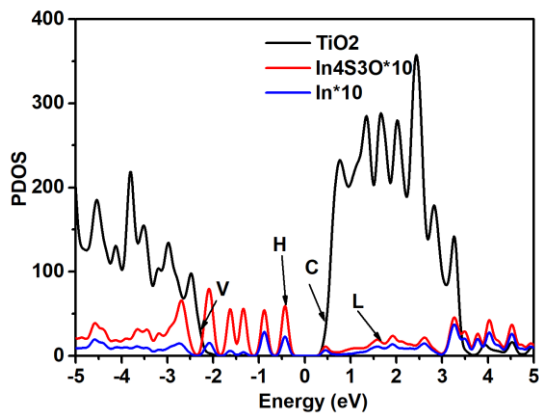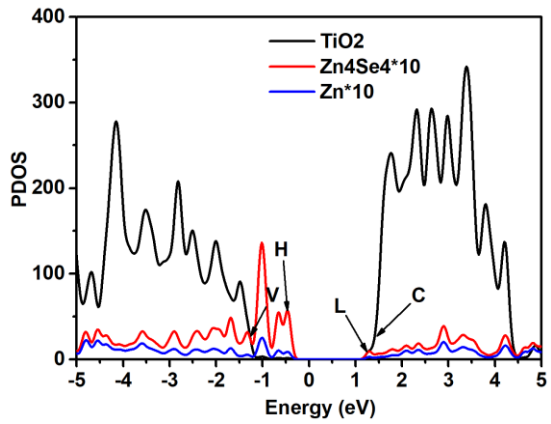

**Fig.S2.** Partial density of states

|                                                   | A1       | A2     | A1/A2    |
|---------------------------------------------------|----------|--------|----------|
| Be <sub>4</sub> O <sub>4</sub> /TiO <sub>2</sub>  | 3.35E-07 | 603.72 | 5.55E-10 |
| Cd <sub>4</sub> O <sub>4</sub> /TiO <sub>2</sub>  | 2.22     | 603.71 | 3.68E-03 |
| Mg <sub>4</sub> O <sub>4</sub> /TiO <sub>2</sub>  | 5.28     | 607.82 | 8.69E-03 |
| Ba <sub>4</sub> O <sub>4</sub> /TiO <sub>2</sub>  | 8.40     | 604.88 | 1.39E-02 |
| Ca <sub>4</sub> O <sub>4</sub> /TiO <sub>2</sub>  | 9.10     | 601.88 | 1.51E-02 |
| Sr <sub>4</sub> O <sub>4</sub> /TiO <sub>2</sub>  | 9.35     | 602.02 | 1.55E-02 |
| Zn <sub>4</sub> S <sub>4</sub> /TiO <sub>2</sub>  | 10.95    | 604.01 | 1.81E-02 |
| Cd <sub>4</sub> Se <sub>4</sub> /TiO <sub>2</sub> | 12.90    | 604.95 | 2.13E-02 |
| Cd <sub>4</sub> S <sub>4</sub> /TiO <sub>2</sub>  | 13.96    | 603.61 | 2.31E-02 |
| Ge <sub>4</sub> S <sub>4</sub> /TiO <sub>2</sub>  | 26.70    | 604.12 | 4.42E-02 |
| Sn <sub>4</sub> S <sub>4</sub> /TiO <sub>2</sub>  | 27.22    | 604.44 | 4.50E-02 |
| In <sub>4</sub> S <sub>4</sub> /TiO <sub>2</sub>  | 29.77    | 603.90 | 4.93E-02 |
| As <sub>4</sub> S <sub>4</sub> /TiO <sub>2</sub>  | 48.46    | 604.45 | 8.02E-02 |

**Table S1.** Effective photoexcitation intensities of different QD/TiO<sub>2</sub>(001) adsorption systems



|                                                   | gap(eV) | wave length of gap (nm) | LUMO-HOMO (eV) | wave length of LUMO-HOMO (nm) | HOMO-VBM (eV) | LUMO-CBM (ev) |
|---------------------------------------------------|---------|-------------------------|----------------|-------------------------------|---------------|---------------|
| pure TiO <sub>2</sub>                             | 2.87    | 433                     |                |                               |               |               |
| Be <sub>4</sub> O <sub>4</sub> @TiO <sub>2</sub>  | 2.76    | 450                     | 3.71           | 335                           | -0.67         | 0.28          |
| Zn <sub>4</sub> S <sub>4</sub> @TiO <sub>2</sub>  | 2.27    | 548                     | 2.33           | 533                           | 0.45          | 0.06          |
| Cd <sub>4</sub> Se <sub>4</sub> @TiO <sub>2</sub> | 2.14    | 581                     | 2.14           | 581                           | 0.33          | -0.16         |
| Sn <sub>4</sub> S <sub>4</sub> @TiO <sub>2</sub>  | 1.83    | 679                     | 1.94           | 641                           | 0.92          | 0.11          |
| Mg <sub>4</sub> O <sub>4</sub> @TiO <sub>2</sub>  | 1.74    | 714                     | 2.82           | 441                           | 0.93          | 1.08          |
| Ge <sub>4</sub> S <sub>4</sub> @TiO <sub>2</sub>  | 1.70    | 731                     | 1.80           | 691                           | 0.99          | 0.10          |
| Cd <sub>4</sub> S <sub>4</sub> @TiO <sub>2</sub>  | 1.65    | 753                     | 1.65           | 753                           | 0.71          | -0.39         |
| Ba <sub>4</sub> O <sub>4</sub> @TiO <sub>2</sub>  | 1.59    | 782                     | 3.19           | 390                           | 1.14          | 1.60          |
| Ca <sub>4</sub> O <sub>4</sub> @TiO <sub>2</sub>  | 1.54    | 807                     | 3.49           | 356                           | 1.21          | 1.95          |
| Cd <sub>4</sub> O <sub>4</sub> @TiO <sub>2</sub>  | 1.50    | 829                     | 1.50           | 829                           | 0.14          | -1.11         |
| Sr <sub>4</sub> O <sub>4</sub> @TiO <sub>2</sub>  | 1.30    | 956                     | 3.10           | 401                           | 1.44          | 1.80          |
| In <sub>4</sub> S <sub>4</sub> @TiO <sub>2</sub>  | 0.87    | 1429                    | 0.87           | 1429                          | 1.72          | -0.16         |
| As <sub>4</sub> S <sub>4</sub> @TiO <sub>2</sub>  | 0.79    | 1573                    | 0.79           | 1573                          | 1.73          | -0.24         |

**Table S2.** The PDOS information of the adsorption system is, in turn, the band gap, the wavelength corresponding to the band gap, the LUMO-HOMO energy level, the HOMO-VBM energy level, and the LUMO-CBM energy level.

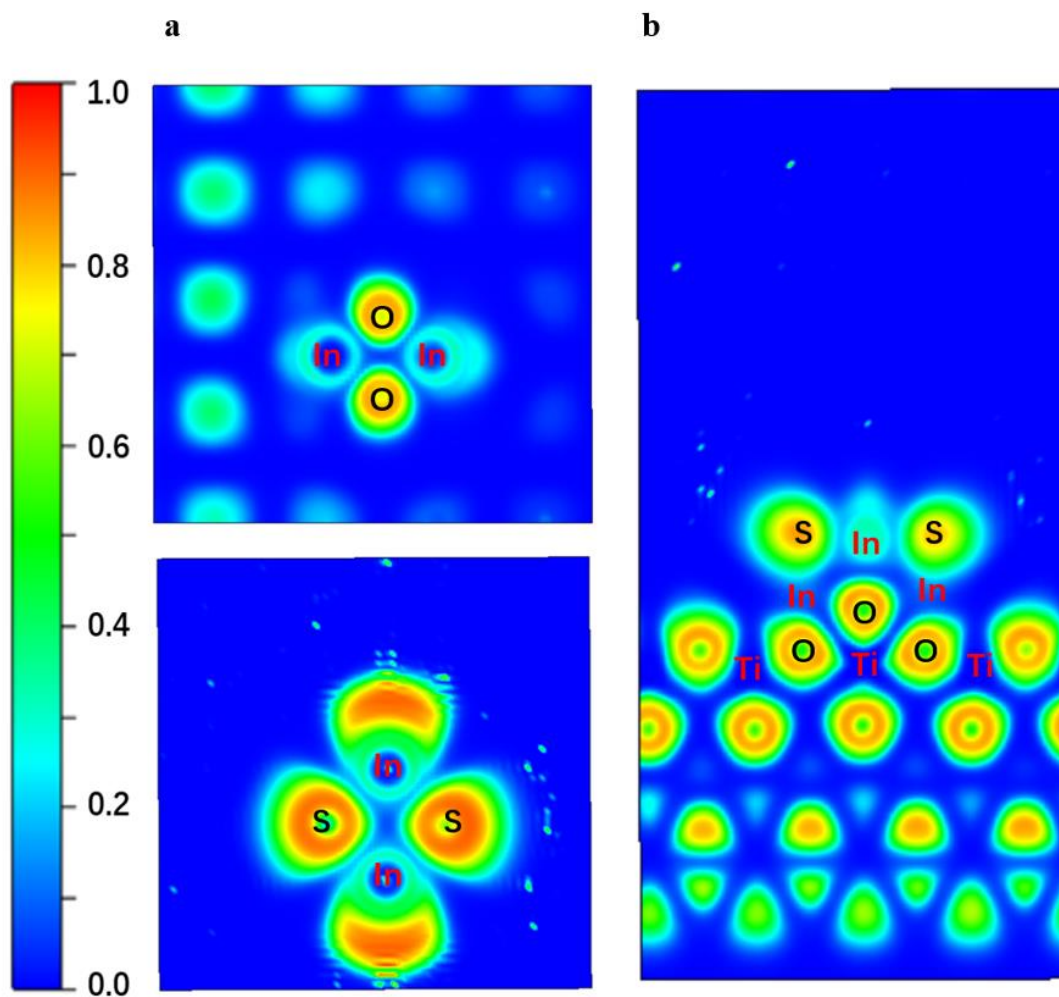

**Fig.S3.** ELF plots of  $\text{In}_4\text{S}_2\text{O}_2/\text{TiO}_2$ , projected on the: (a) (001) plane, (b) (100) plane.

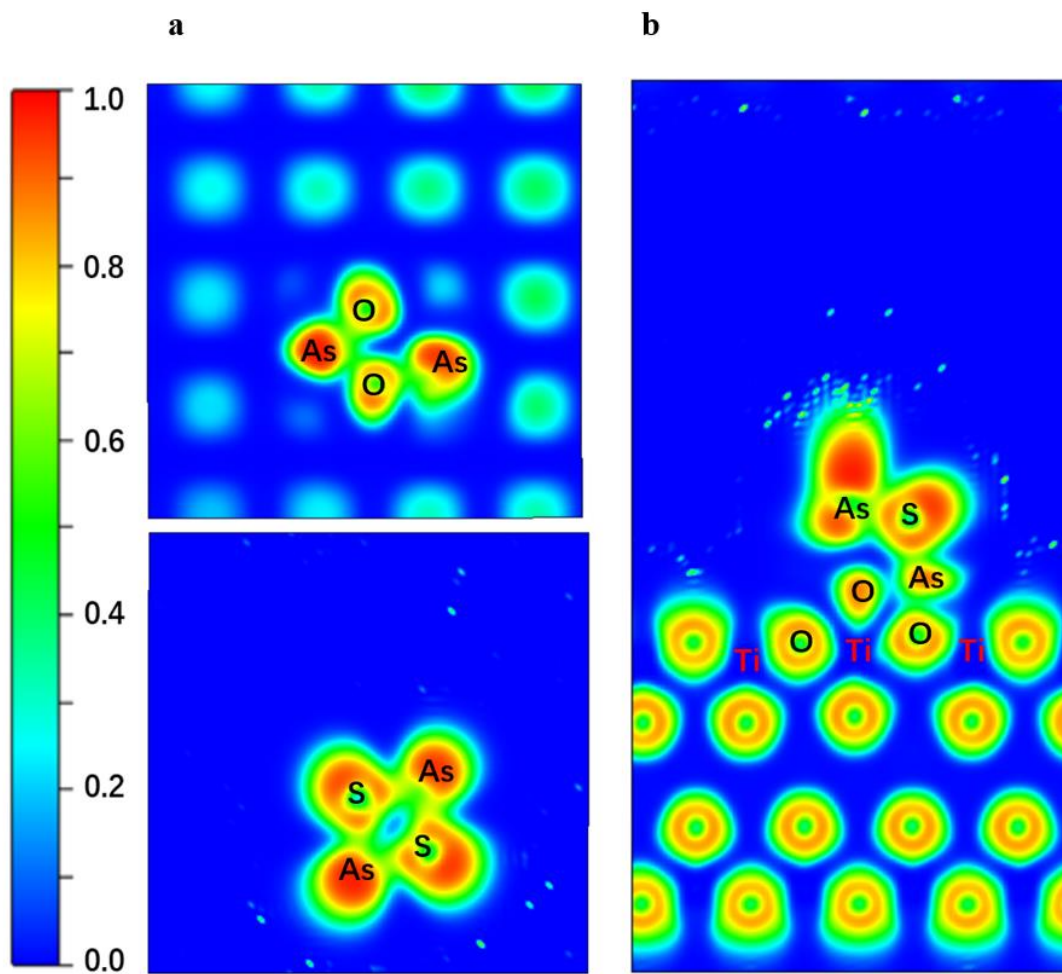

**Fig.S4** ELF plots of  $\text{As}_4\text{S}_2\text{O}_2/\text{TiO}_2$ , projected on the: (a) (001) plane, (b) (100) plane.
